# Supplementary material for: Combined multivariate analysis and machine learning reveals a predictive module of metabolic stress response in Arabidopsis thaliana
Source: Royal Society of Chemistry journal article supplement (doi:10.1039/c8mo00095f), 2018-11-02
Supplement: c8mo00095f6.xlsx [file c8mo00095f6.xlsx]

## Sheet: Cal Standard Mix
Metabolite	Retention Index (RI)	Quant Mass
Pyruvic acid (1MEOX) (1TMS)	1065.4	174
Valine (1TMS)	1099.6	72
Alanine (2TMS)	1115.6	116
Glycine (2TMS)	1130.8	102
Leucine (1TMS)	1164.5	86
Proline (1TMS)	1183.1	70
Valine (2TMS)	1227.1	144
Serine (2TMS)	1266.8	132
Leucine (2TMS)	1282.6	158
Threonine (2TMS)	1304.4	117
Proline (2TMS)	1307.5	142
Glycine (3TMS)	1317.5	174
Succinic acid (2TMS)	1321.6	75
Fumaric acid (2TMS)	1353.1	245
Serine (3TMS)	1371.4	204
Threonine (3TMS)	1398.6	57
Aspartic acid (2TMS)	1429.7	160
Glutamine (-H2O) (2TMS)	1485.3	155
Malic acid (3TMS)	1503.5	233
Putrescine (3TMS)	1524	174
Aspartic acid (3TMS)	1533.5	232
Glutamic acid (2TMS)	1537.8	84
Phenylalanine (1TMS)	1553.5	120
Proline (+CO2) (2TMS)	1590.1	142
Asparagine (2TMS)	1603.6	159
Glutamic acid (3TMS)	1631.1	246
Phenylalanine (2TMS)	1638.1	218
Asparagine (3TMS)	1686.8	116
Putrescine (4TMS)	1754	174
Glutamine (3TMS)	1786.5	156
Citric acid (4TMS)	1843.1	273
Fructose (1MEOX) (5TMS) MP	1908.1	103
Fructose (1MEOX) (5TMS) BP	1918.2	103
Glucose (1MEOX) (5TMS) MP	1934.7	319
Glucose (1MEOX) (5TMS) BP	1952.5	319
Tyrosine (3TMS)	1954.6	218
myo-Inositol (6TMS)	2128.7	217
Spermidine (4TMS)	2217	200
Spermidine (5TMS)	2284	144
Spermidine (+CO2) (5TMS)	2495	174
Sucrose (8TMS)	2705.5	361
Maltose (1MEOX) (8TMS) MP	2817	204
Maltose (1MEOX) (8TMS) BP	2845	204
Galactinol (9TMS)	3070.4	204
Raffinose (11 TMS)	3494.9	361

## Sheet: normalized Data
Sample	gt	cond	Glycine	Serine	Suc	Frc	Glc	Raf	Gol	myoIn	Phe	Tyr	Pyr	Val	Leu	Ala	Citrate	Asp	Asn	Threonine	Succinate	Fumarate	Malate	Proline	Glu	Gln	Put	Spdine	Maltose
Col_control	Col	control	529.843	5993.19	8178.44	614.827	1812.06	43.4905	569.712	5934.6	339.148	45.2762	295.869	1127.75	228.684	2163.67	776.374	2823.42	963.451	3564.39	1117.76	25981.9	2504.01	1729.82	4744.24	11146.1	468.028	272.061	76.9862
Col_control	Col	control	477.077	5533.53	7525.81	636.778	1642.72	256.034	463.496	7195.25	338.008	52.0074	295.489	688.211	233.32	1708.67	1341.16	2605.4	635.877	3464.14	1140.95	30891.7	2813.47	2163.37	1062.01	5669.31	441.56	280.727	70.1422
Col_control	Col	control	348.604	4954.33	7969.26	746.037	1599.97	586.487	1703.2	2562.08	329.07	37.3531	197.23	799.426	236.454	2096.58	1013.4	1772.83	1073.69	2753.31	1257.38	25847.4	1831.71	1473.09	1416.6	5133.39	529.899	56.8067	113.653
Col_control	Col	control	349.282	7468.44	8284.19	737.715	2639.09	601.314	1017.02	6308.7	338.172	41.9656	248.664	745.963	179.303	1714.96	1132.27	2981.75	825.284	4459.11	1104.21	21546.3	1226.81	2076.19	6835.64	7778.73	570.344	122.668	139.573
Col_control	Col	control	476.93	7170.98	8059.06	802.141	1575	560.948	2058.3	3462.38	360.075	40.7566	262.605	1059.42	271.379	2092.61	3800.54	3093.13	789.192	3825.8	1152.58	39594.5	3604.56	2036.46	3173.39	4384.88	489.197	57.1322	111.567
Col_control	Col	control	321.779	4323.71	8059.06	534.019	1554.3	256.034	380.802	5706.03	332.797	50.2786	207.654	765.679	241.8	1407.88	3585.42	2706.12	607.028	2732.76	1152.58	25799	2883.93	1332.56	1987.74	7086.4	402.721	238.983	60.7454
Col_control	Col	control	487.041	5465.51	8337.6	859.538	2559.43	256.034	555.38	7066.89	336.763	49.2961	301.598	852.617	209.85	1465.68	1236.65	2048.38	629.818	3545.97	1142.6	33048.9	2687.58	1297.28	338.592	3363.68	522.632	315.091	101.345
Col_stress	Col	stress	6551.16	10418.8	9661.66	8329.41	23656.3	752.014	1518.7	5122.32	894.216	84.7612	213.708	1655.24	643.814	6385.64	4197.68	6717.91	2127.26	9577.71	3691.13	32911.8	8326.67	41484.7	16506.1	32354.1	1461.51	429.907	117.47
Col_stress	Col	stress	5068.18	6873.49	8840.54	6212.79	19705.4	423.066	1110.73	4096.78	806.55	75.768	206.321	1393.1	414.643	4032.63	7321	4699.83	868.128	6727.6	2049.81	23428.8	6243.83	24157.1	4309.62	25352.2	1196.6	493.672	103.898
Col_stress	Col	stress	5491.53	9890.8	11397	8053.77	22543.2	4301.93	4343.04	5436.84	820.186	48.1201	98.5207	1832.07	405.051	9181.78	3680.71	6532.39	2474.45	8856.36	3166.88	33379.8	7038.04	34175.4	12599.5	24490.9	1524.46	142.361	156.206
Col_stress	Col	stress	4279.99	6302.95	6654.34	4157.49	9480.62	3255.84	3062.23	2991.89	700.673	53.08	101.05	1120.42	310.733	4861.53	4729.54	6002.94	2312.78	5250.72	2178.55	22571.9	6671.44	19082.9	8668.8	33089.6	1197.72	137.427	116.19
Col_stress	Col	stress	5682.76	11195.9	12824.5	7829.1	25794.8	547.59	1677.76	5159.66	868.169	64.8645	228.507	2416.28	585.85	6838.97	3746.55	5076.61	2927.99	9584.34	3298.85	27174.2	8393.12	34806.1	13516.7	35329.7	1930.33	476.098	211.327
Col_stress	Col	stress	5258.95	11601.7	11958.8	9531.35	26947.8	4824.88	4516.93	5979.91	962.721	71.506	166.624	1986.21	477.492	12630.5	3703.1	5914.42	3098.84	10102.2	3318.29	31809.9	6633.42	33881.2	21762.3	38633.3	1467.5	193.743	175.704
Col_stress	Col	stress	4514.91	6604.61	8415.78	5892.06	15498.7	2759.04	1667.77	3384.44	700.882	55.9514	131.084	1030.98	312.073	4897.32	6599.56	7172.17	1519.05	3900.59	1673.18	39053.1	7217.75	24231.2	14630.6	37228.9	1062.01	236.407	124.964
pgm1_control	pgm1	control	1369.01	5751.78	45827	7375.24	17677.7	1164.48	396.819	4143.33	801.966	57.4844	270.037	1304.22	249.01	2829.19	4332.55	2625.58	5617.76	9277.93	2778.14	49327.1	4195.04	15157.3	2331.15	7063.34	1358.29	491.477	193.529
pgm1_control	pgm1	control	2750.87	5094.53	46745.4	7375.24	16767.8	1164.48	416.527	4143.33	730.638	57.4844	226.998	1623.53	255.937	2905.52	4479.61	2284.95	5017.92	8904.09	3246.74	95818.1	3572.21	11702.1	5575	7134.2	1429.75	455.678	189.168
pgm1_control	pgm1	control	606.915	1984.53	15378.6	4993.31	4038.23	1164.48	146.411	4143.33	733.603	48.7542	126.516	492.44	116.375	1179.55	4010.78	2363.13	2740.43	3634.07	1497.35	51320.6	2905.32	5496.05	2879.57	6265.75	641.912	240.926	68.9766
pgm1_control	pgm1	control	729.444	2584.87	30508.3	8827.82	9004.52	47.9249	532.05	3891.61	637.778	58.6571	173.045	1068	136.107	1374.48	3436.64	3863.02	8847.72	6835.92	2300.5	72520.9	2565.23	9870.68	12173.7	10503.2	1300.37	210.968	197.601
pgm1_control	pgm1	control	559.69	2928.13	25443.1	7820.39	6151.53	47.7201	613.823	3662.28	562.583	55.6122	76.1048	909.158	123.756	3332.25	3289.68	2401.42	13152.5	4543.05	1738.52	59776.7	2351.43	5857.8	12218.2	8760.3	1214.25	112.285	139.59
pgm1_control	pgm1	control	859.795	3197.53	27121.2	8758.96	7691.72	1164.48	258.811	3872.98	587.498	61.6424	199.023	955.899	160.106	2331.56	3086.58	2151.57	4827.8	5793.08	1893.79	73108.1	2926.36	9164.91	6531.35	8571.78	1012.45	267.856	102.946
pgm1_control	pgm1	control	760.284	3082.6	28097.4	7851.26	5778.08	45.8504	748.175	3810.49	672.301	53.3696	87.5068	1151.97	216.854	3194.95	2471.82	1603.4	8122.77	5468.29	1682.97	57613.1	2071.11	5734.35	3844.79	4955.73	932.459	82.0246	121.852
pgm1_control	pgm1	control	579.849	3431.52	24360.3	8574.57	7249.82	48.8135	580.86	3289.7	684.898	49.8675	106.854	974.826	140.245	4786.75	1262.85	1390.82	10912.9	5283.75	1556.56	53676.9	1583.02	8135.28	9698.29	6804.17	1004.33	99.6459	113.296
pgm1_stress	pgm1	stress	2444.12	5838.31	18759.8	3109.17	2955.89	175.675	614.648	2124.31	514.272	48.0494	187.329	1752.12	312.056	4527.83	3223.5	3662.17	2883.53	6380.46	2225.55	20992	4331.47	35477	6390.86	15582.9	1653.59	337.814	76.7642
pgm1_stress	pgm1	stress	2508.52	4799.55	16234.7	2533.72	1872.22	906.507	1205.44	1633.89	499.947	41.2706	122.82	1730.22	164.286	7052.29	3779.75	4325.99	6023.23	4772.6	1269.54	17973.6	3941.27	27938.5	6938.55	13621.1	1641.58	79.1405	76.6284
pgm1_stress	pgm1	stress	2770.65	8309.16	25165.2	4090.37	2904.88	1385.94	1753.52	2811.55	735.266	46.1393	171.935	1730.22	308.808	5696.93	4479.96	4714.16	8874.5	8464.46	2611.7	20197.3	5056.48	47530.5	10168	15311.2	2637.98	134.895	122.829
pgm1_stress	pgm1	stress	1873.22	5248.56	17983.5	2785.4	1913.36	956.617	1219.93	1961.18	503.382	33.7171	100.373	1555.89	199.63	6940.56	3375.63	3854.5	6090.8	5286.37	1859.72	19372.3	3739.9	29239.2	6098.47	11278.7	1752.78	86.2669	74.9048
pgm1_stress	pgm1	stress	2780.47	6669.78	19490.4	2624.65	1837.29	127.811	543.684	2074.71	629.265	60.1201	248.239	1785.79	276.358	5830.78	4785.43	4540.91	3322.31	6590.51	2635.11	22203.4	5497.53	44047.8	10163.2	24750.4	1902.41	415.004	59.5391
pgm1_stress	pgm1	stress	2467.82	7865.81	25319.5	4716.52	2412.76	1320.44	913.821	2418.11	606.709	42.7266	175.702	1726.91	228.51	3713.23	4072.25	4277.01	4209.3	7371.32	2346.85	19548.3	5608.78	37413.4	12353.7	16323.4	2120.96	168.131	123.281
pgm1_stress	pgm1	stress	2714.86	6823.7	22618.1	3450.92	2992.9	62.7322	608.061	2341.41	667.284	60.6904	223.738	1830.36	273.236	6116.88	4789.25	4343.38	3513.42	7621.78	2105.88	21094	4325.56	39839.4	7099.61	25156.9	2317.16	486.042	75.7978
spsa1_control	spsa1	control	494.159	6324.99	4889.93	255.904	661.703	617.256	416.959	2683.45	407.009	48.9658	255.923	1126.04	284.7	3100.83	2954.23	3014.56	878.971	3994.89	1345.94	26646	4672.15	8449.55	6792.84	10398.8	424.365	189.029	38.1204
spsa1_control	spsa1	control	435.301	3574.07	3660.66	243.565	588.069	617.256	306.429	1941.16	302.272	49.6784	141.266	405.767	279.546	1533.4	1729.46	2666.1	534.626	2433.38	1153.95	23144.4	5250.89	4091.32	1791.4	5236.18	341.255	143.326	35.4325
spsa1_control	spsa1	control	484.395	6455.85	8120.96	496.796	950.416	772.913	1666.58	3507.07	463.297	50.4572	186.717	1120.73	283.904	4155.66	1375.66	1994.96	1712.39	3497.85	1220.5	24216	2776.55	4605.28	7103.55	8897.99	634.057	38.2745	88.8891
spsa1_control	spsa1	control	460.253	5396.88	5764.26	290.539	522.744	655.906	1355.02	2630.32	436.416	47.6432	178.762	931.671	273.401	3272.14	3732.26	2590.64	1632.19	3257.76	1555.47	24602.7	3796.45	4698.87	10536.9	7868.36	565.56	29.0746	61.0073
spsa1_control	spsa1	control	583.3	4403.73	7787.56	9.88453	1931.25	1022.57	1386.24	2418.62	497.859	54.1145	235.426	1135.99	265.965	2341.79	687.684	2708.49	857.649	3555.92	1417.61	20435	1424.74	7884.81	6494.12	6192.44	616.869	101.201	117.345
spsa1_control	spsa1	control	453.381	6640.33	7657.2	474.384	850.911	966.815	1513.4	3471.41	401.079	43.0593	167.433	1105.54	296.878	5134.32	815.936	1559.52	1601.26	3735.27	1740.14	23387.3	2432.47	5712.11	11855.4	6188.55	791.67	14.2335	77.1507
spsa1_control	spsa1	control	686.555	4630.64	7945.23	9.86873	2056.03	902.59	1371.39	2819.22	452.652	48.8425	279.323	1165	272.427	2385.03	811.002	2433.63	853.372	4416.38	1461.04	27626.8	2379.58	8468.35	6525.81	5691.44	664.784	101.217	133.902
spsa1_stress	spsa1	stress	8759.09	13490.2	9566.2	5472.39	16034.9	1868.06	2366.84	5681.04	578.551	79.4557	296.171	1699.43	186.914	8420.25	7311.44	3772.29	3827.11	9972.99	3626.33	55590	13293.3	56000.5	21959.3	39413.2	2201.59	332.012	139.556
spsa1_stress	spsa1	stress	6438.71	11113.6	7570.77	4291.43	13185.4	6759.46	4606.04	4286.62	461.864	41.8829	103.583	1076.67	173.829	14611.7	5988.54	2269.41	3006.74	7234.23	2834.33	43723.9	9504.47	37402.4	29348.1	74832.8	2205.18	77.578	144.324
spsa1_stress	spsa1	stress	10700.1	14482.1	10151.3	6993.75	21828.2	1610.22	2667.14	6567.76	566.662	35.2493	269.458	1511.33	222.913	9315.26	5289.75	4380.05	2330.53	10334.3	3542.41	65273	15264.8	46213.2	16858.8	31256.2	2163.03	353.611	170.787
spsa1_stress	spsa1	stress	7278.67	10315.5	7656.82	4734.49	13799.4	1243.66	1879.03	4733.26	430.928	35.2493	184.92	1211.83	173.528	6799.18	5410.77	3759.2	2331.09	7974.28	3298.4	47945.1	14580.9	31355.9	23289.4	19144.7	1587.26	356.663	102.501
spsa1_stress	spsa1	stress	6996.82	11248.3	10280.9	6415.11	19332.2	6986.94	6046.21	5408.02	520.912	60.2976	1.14648	1414.96	177.385	11565.7	3643.46	2344.05	4026.66	8138.89	3227.35	45873.5	8067.92	37593.5	14659.8	60512.5	2183.88	112.324	191.501
spsa1_stress	spsa1	stress	8034.68	12129.9	5092.58	2177.56	6232.03	4300.77	1788.71	5335.34	511.784	29.8594	93.7746	576.625	186.914	2577.81	4820.69	1880.79	2518.29	5634.68	3305.76	51681.1	5191.56	24095	16995.3	35275.1	1105.42	113.834	86.4395
