# Supplementary figures and images for: Combined multivariate analysis and machine learning reveals a predictive module of metabolic stress response in Arabidopsis thaliana
Source: Royal Society of Chemistry journal article supplement (doi:10.1039/c8mo00095f), 2018-11-02

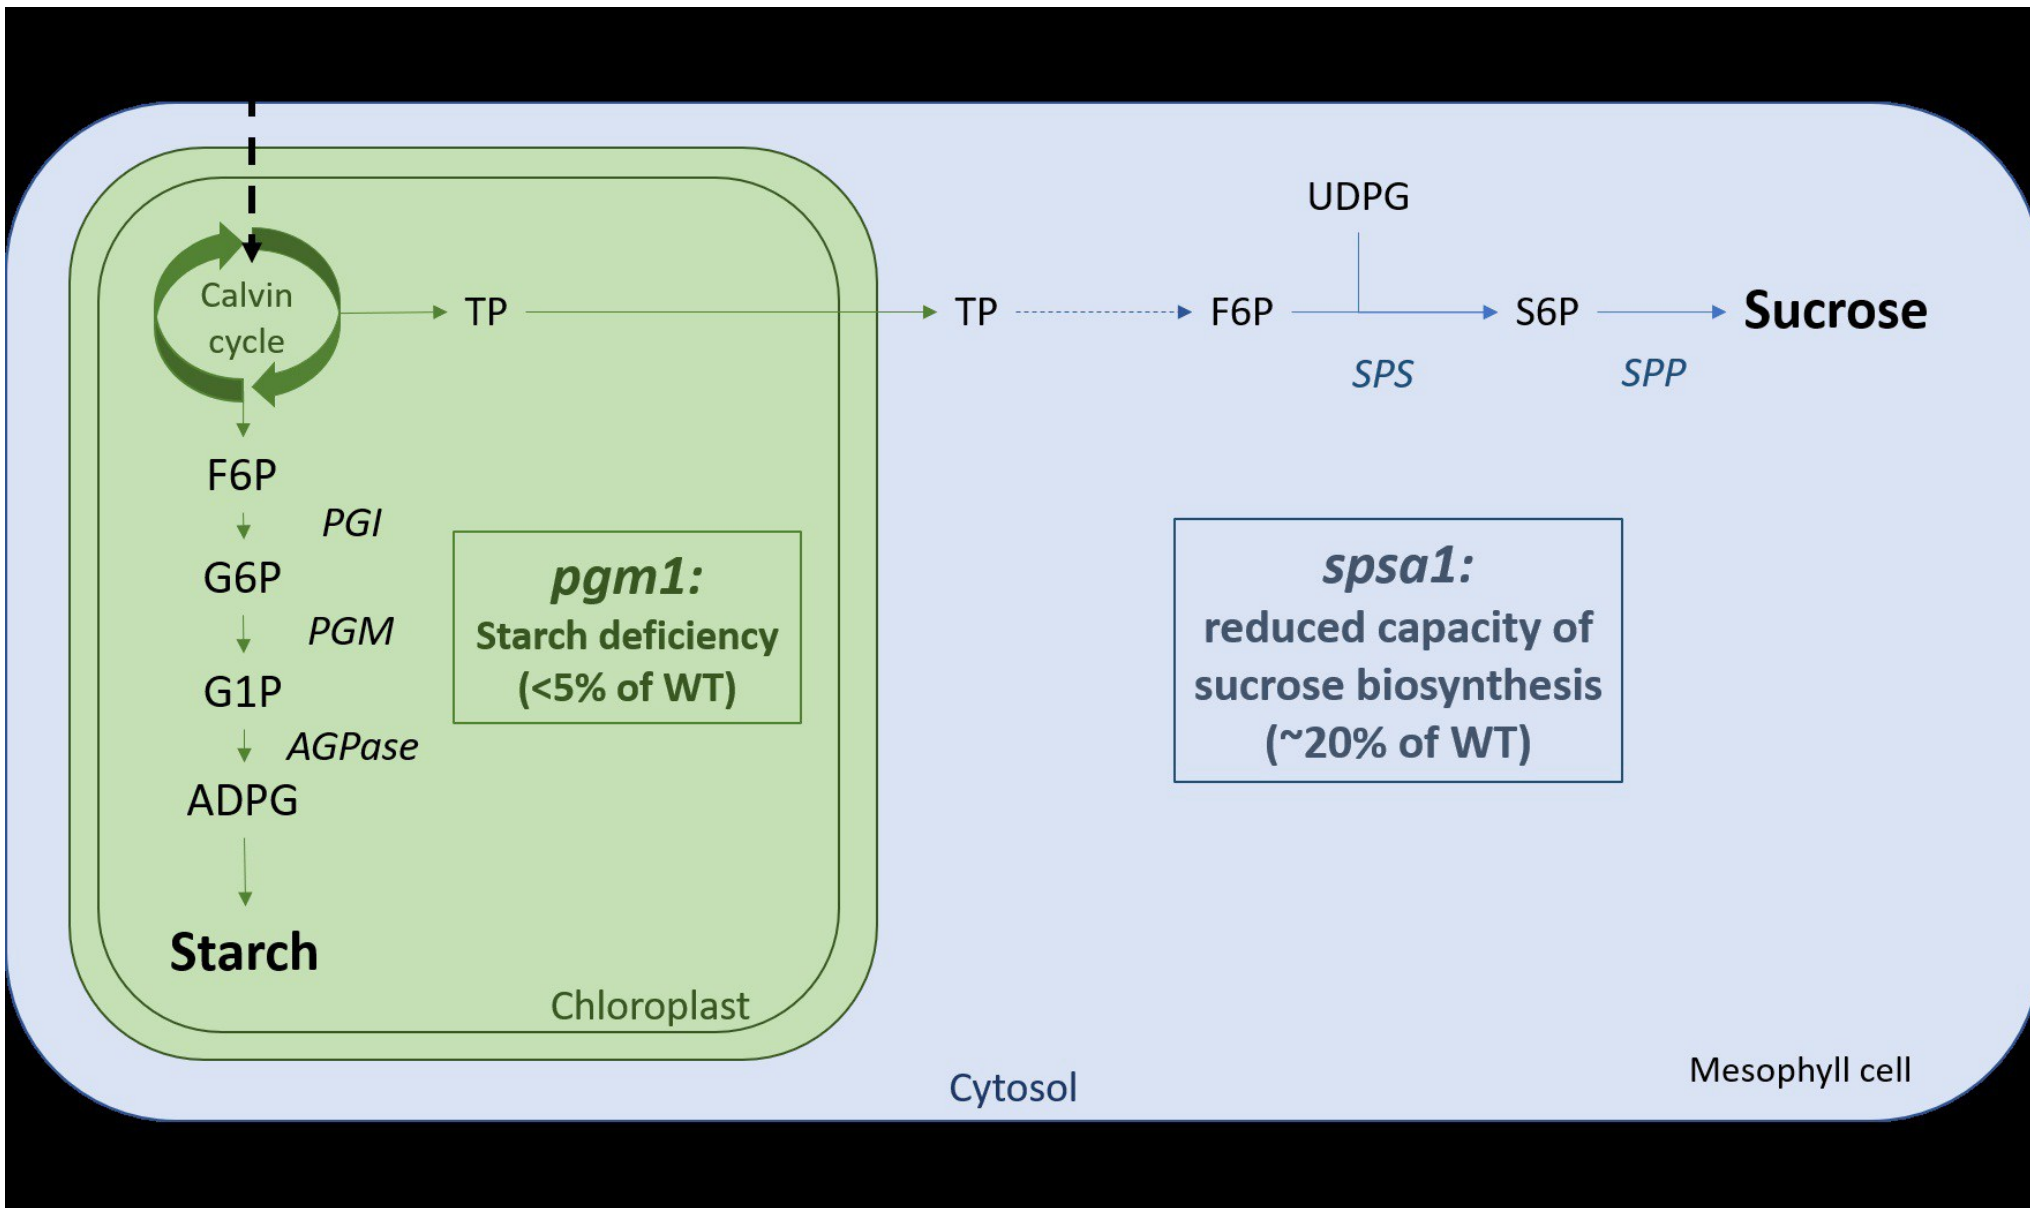

Supplement: c8mo00095f1.pdf [file c8mo00095f1.pdf]

### SPSA1; AT5G20280

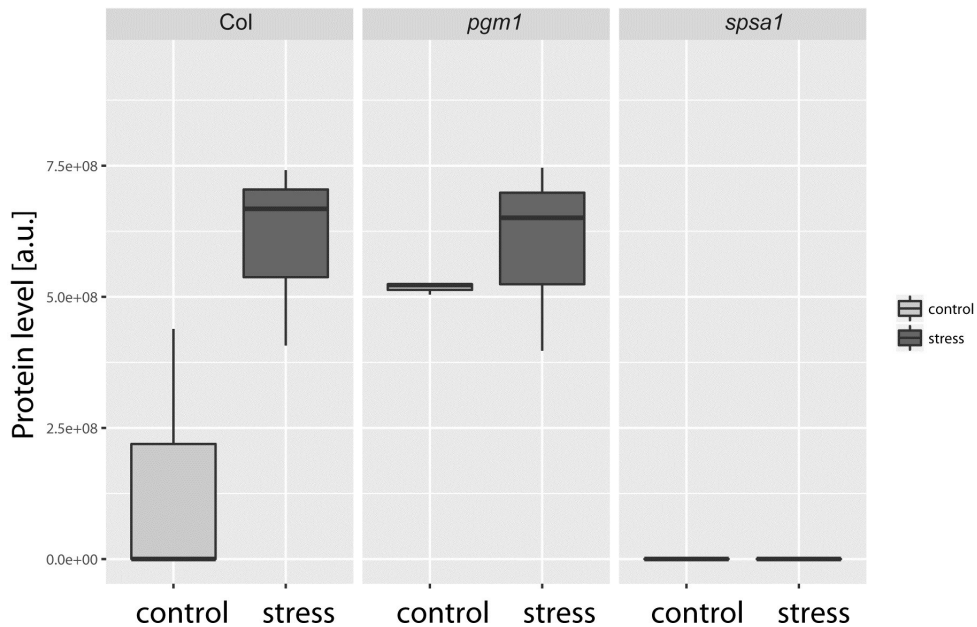

Supplement: c8mo00095f3.pdf [file c8mo00095f3.pdf]
