# Supplementary figures and images for: Combined multivariate analysis and machine learning reveals a predictive module of metabolic stress response in Arabidopsis thaliana
Source: PubMed Central journal article supplement — Mol Omics. 2018 Nov 2;14(6):437–49. doi: 10.1039/c8mo00095f (PMC6289107; doi:10.1039/c8mo00095f), 2018-11-02

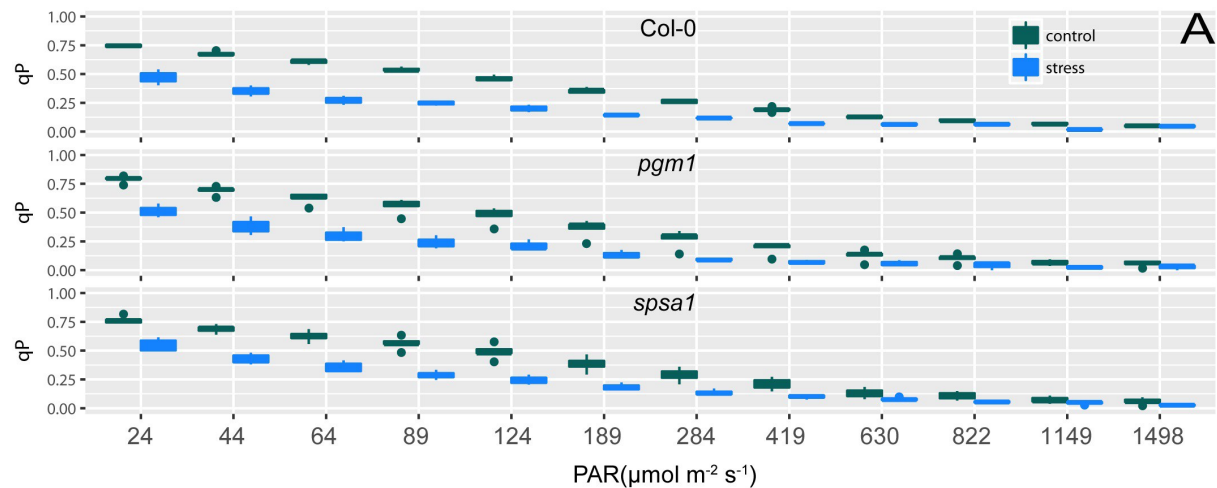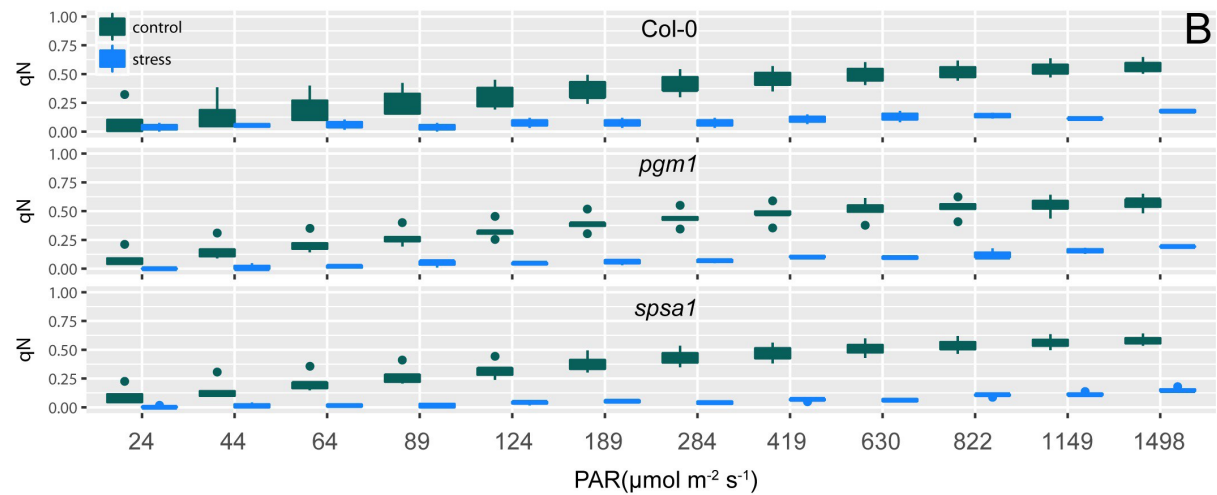

Supplement: MO-014-C8MO00095F-s002.pdf [file MO-014-C8MO00095F-s002.pdf]

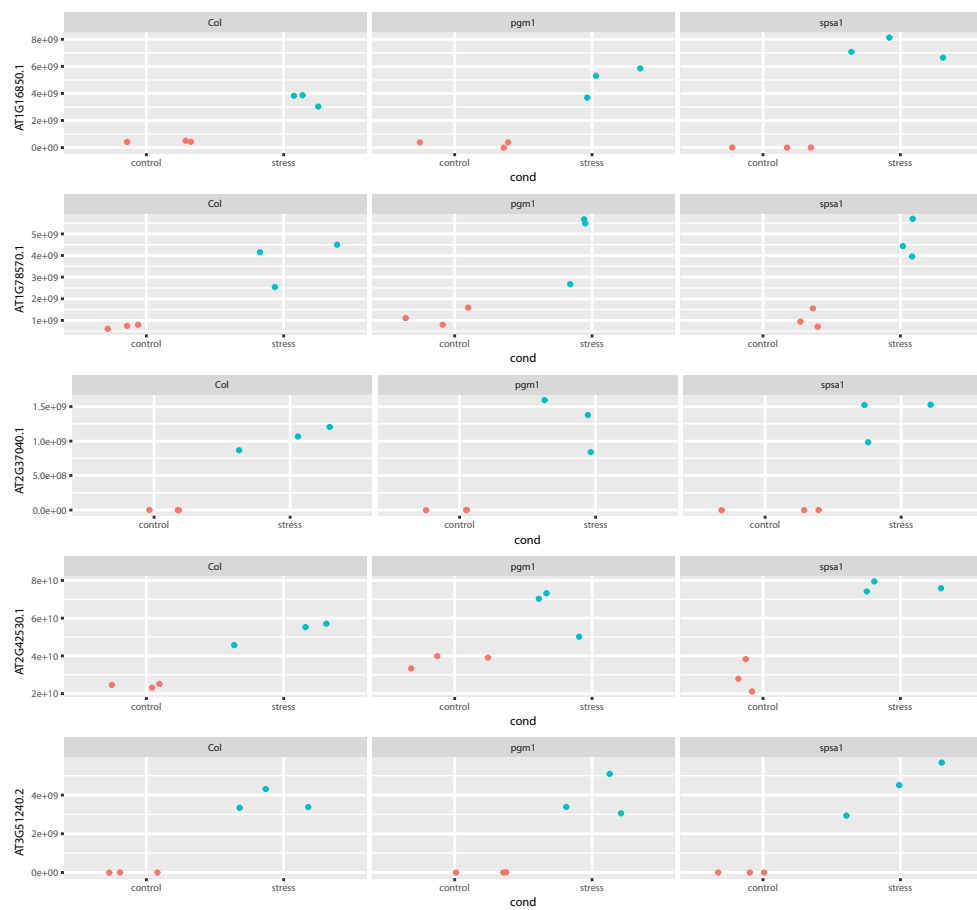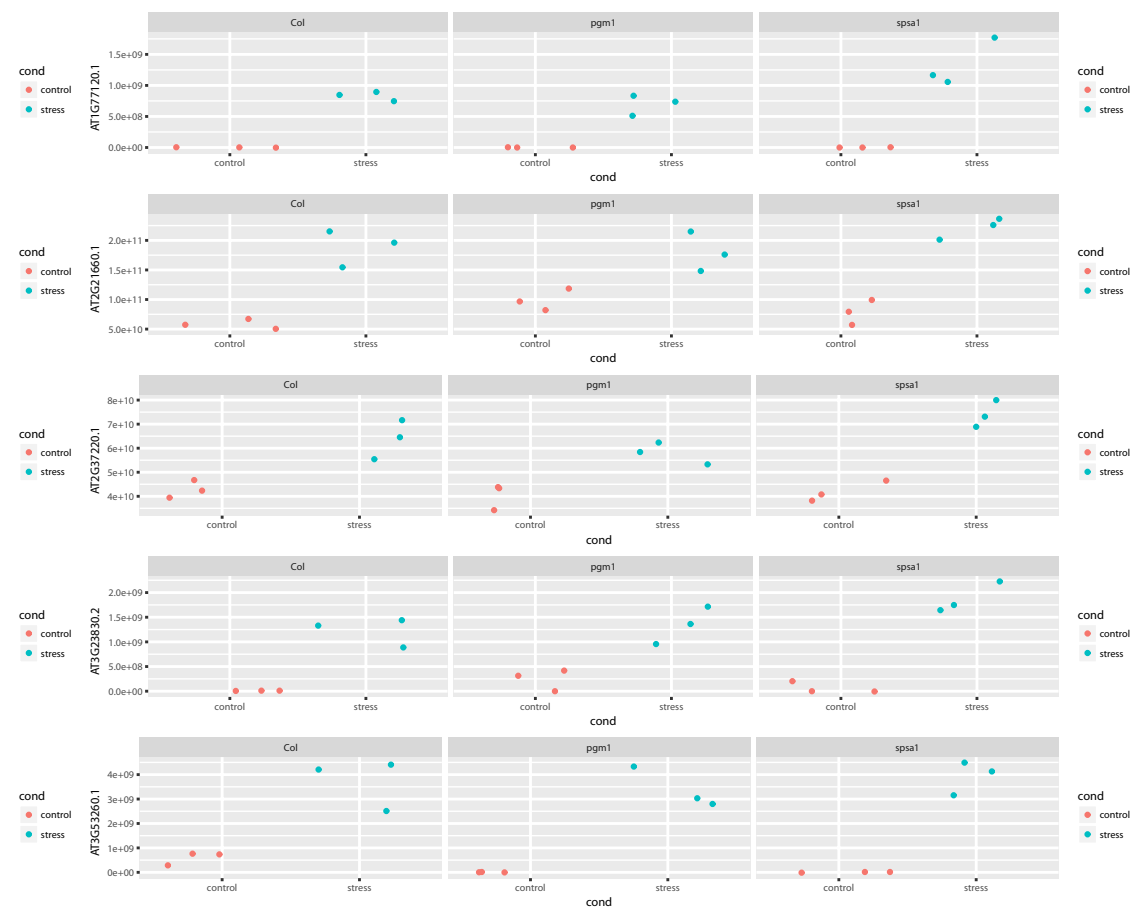

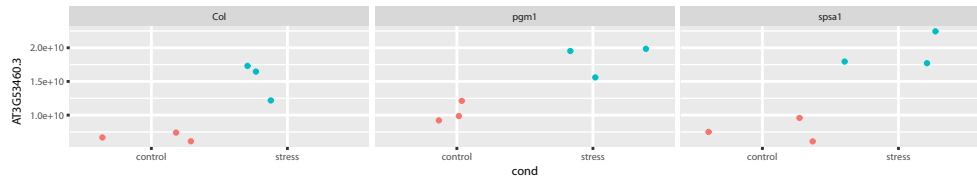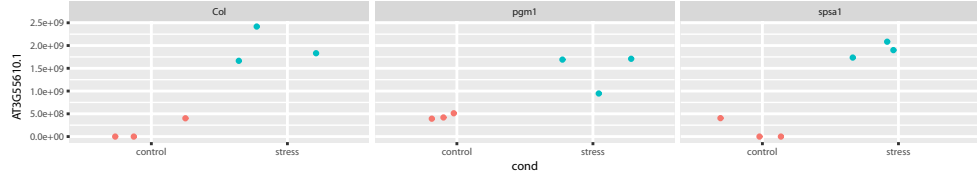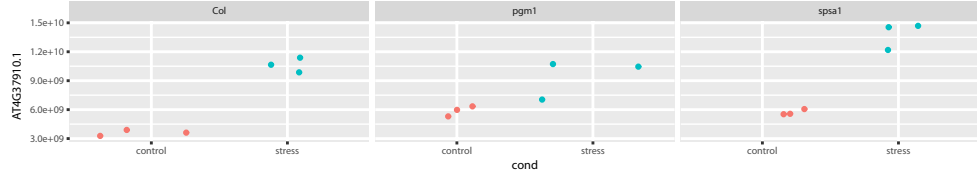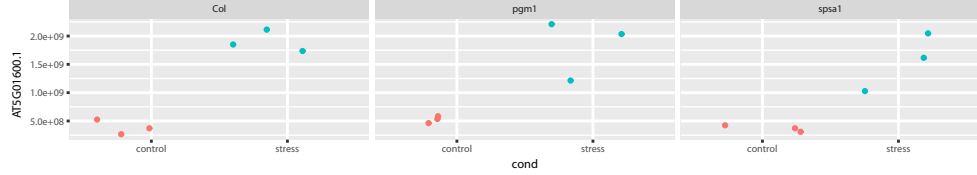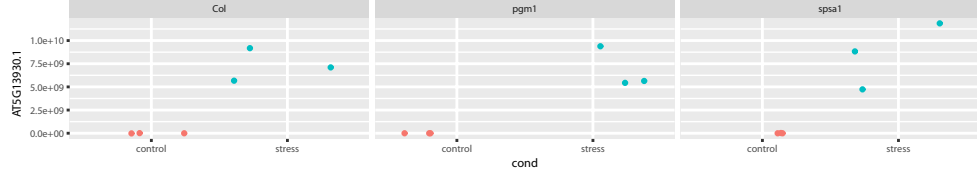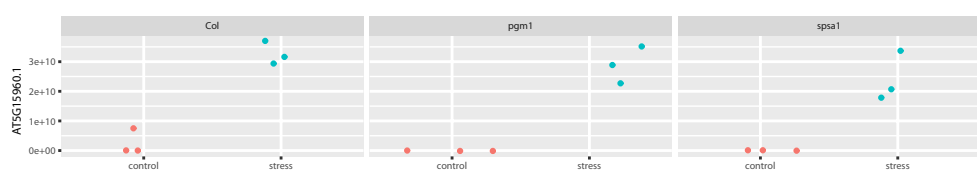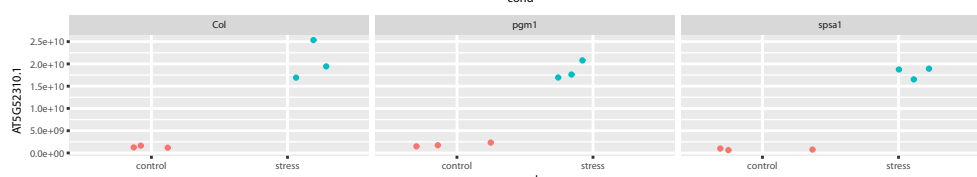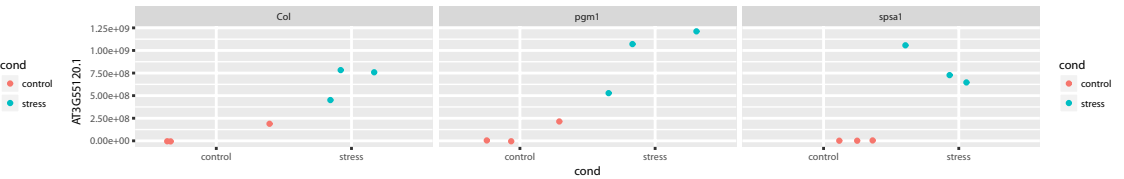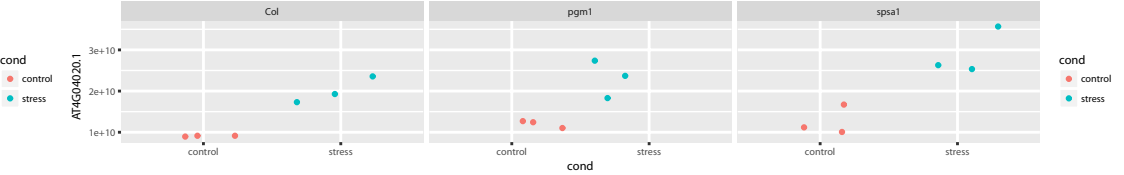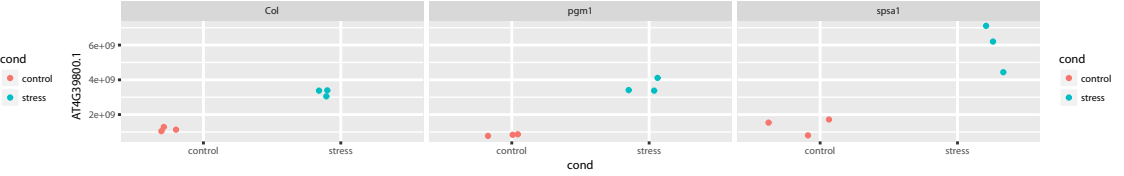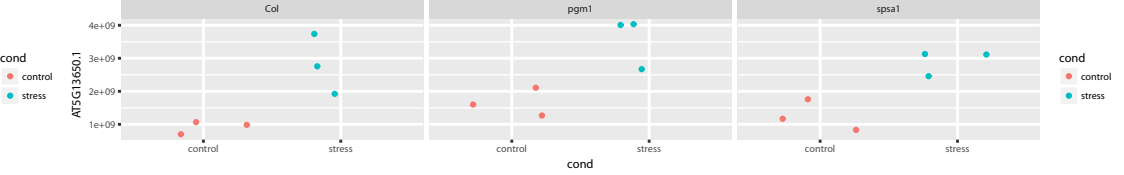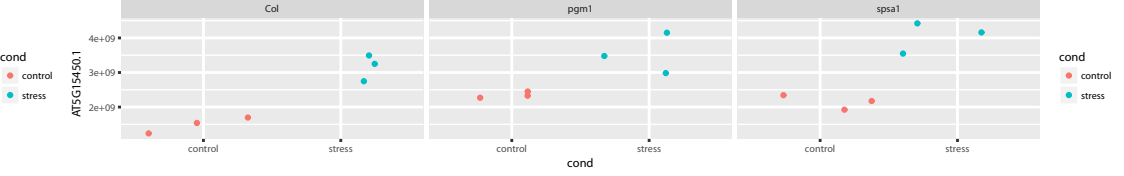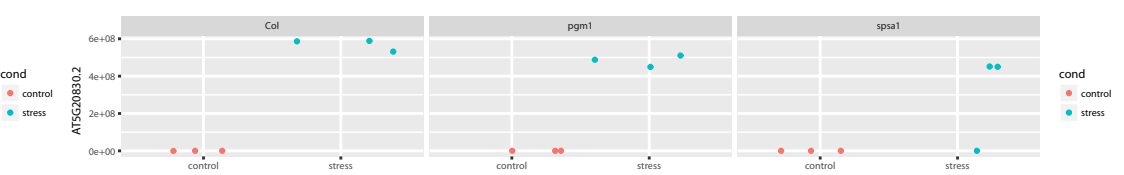

Supplement: MO-014-C8MO00095F-s004.pdf [file MO-014-C8MO00095F-s004.pdf]
